# Supplementary material
Source: publisher figshare collection journal article supplement (https://acs.figshare.com/ndownloader/files/24031317)
Supplement: Supplementary file 1 [file 24031317]

## Supporting Information

# Charge transport layer dependent electronic band bending in perovskite solar cells and its correlation to light induced device degradation

*Junseop Byeon<sup>1,2,†</sup>, Jutae Kim<sup>1†</sup>, Ji-Young Kim<sup>3</sup>, Gunhee Lee<sup>1,4</sup>, Kijoon Bang<sup>1</sup>, Namyoung Ahn <sup>\*1</sup>, and Mansoo Choi<sup>\*1,2</sup>*

<sup>1</sup>Global Frontier Center for Multiscale Energy Systems, Seoul National University, Seoul 08826, Republic of Korea.

<sup>2</sup>Department of Mechanical and Aerospace Engineering, Seoul National University, Seoul 08826, Republic of Korea.

<sup>3</sup>Advanced Analysis Center, Korea Institute of Science and Technology (KIST), Hwarangno 14-gil 5, Seongbuk-gu, Seoul 02792, Republic of Korea.

<sup>4</sup> Department of Environment Machinery, Korea Institute of Machinery & Materials, Daejeon, South Korea

\* To whom correspondence should be addressed.

E-mail: Mansoo Choi (mchoi@snu.ac.kr), Namyoung Ahn([nyny92@snu.ac.kr](mailto:nyny92@snu.ac.kr))

† These authors contributed equally to this work.

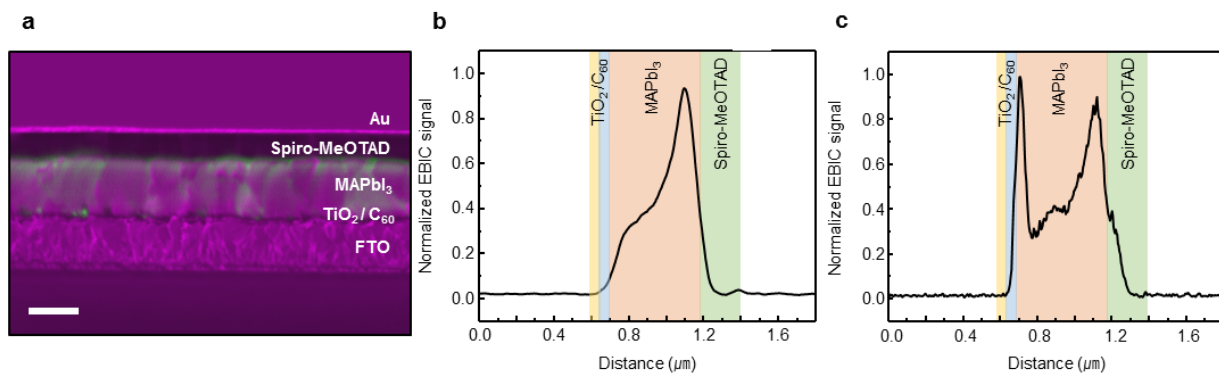

**Figure S1.** (a) Cross sectional EBIC image overlapped with SEM image of the TiO<sub>2</sub>/C<sub>60</sub>-based device. Line profiles of EBIC signal perpendicular to layers of the regions (b) without and (c) with a local pinhole in the C<sub>60</sub> layer in the device.

Scale bar: 500nm.

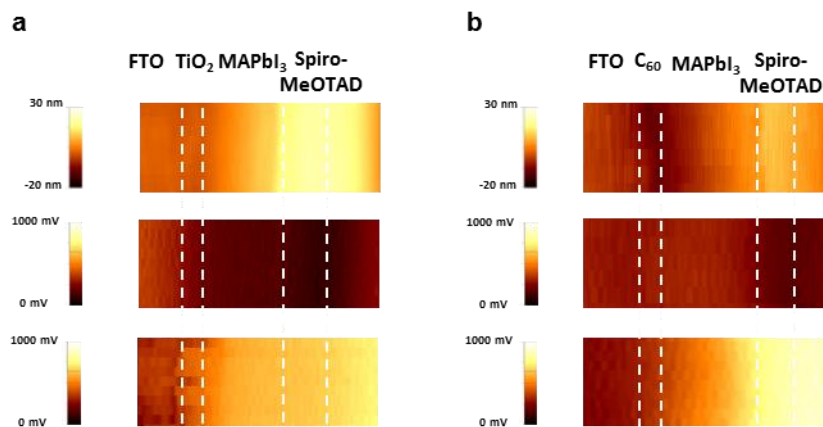

**Figure S2.** (a) A topographic image (Top), CPD distribution images under short-circuit (middle), and open circuit (bottom) conditions of the TiO<sub>2</sub>-based device. (b) A topographic image (Top), CPD distribution images under short-circuit (middle), and open-circuit (bottom) conditions of the C<sub>60</sub>-based device. RMS of roughness in the topographic images of the TiO<sub>2</sub>-based and C<sub>60</sub>-based devices are 9.32 nm, 5.55 nm, respectively.

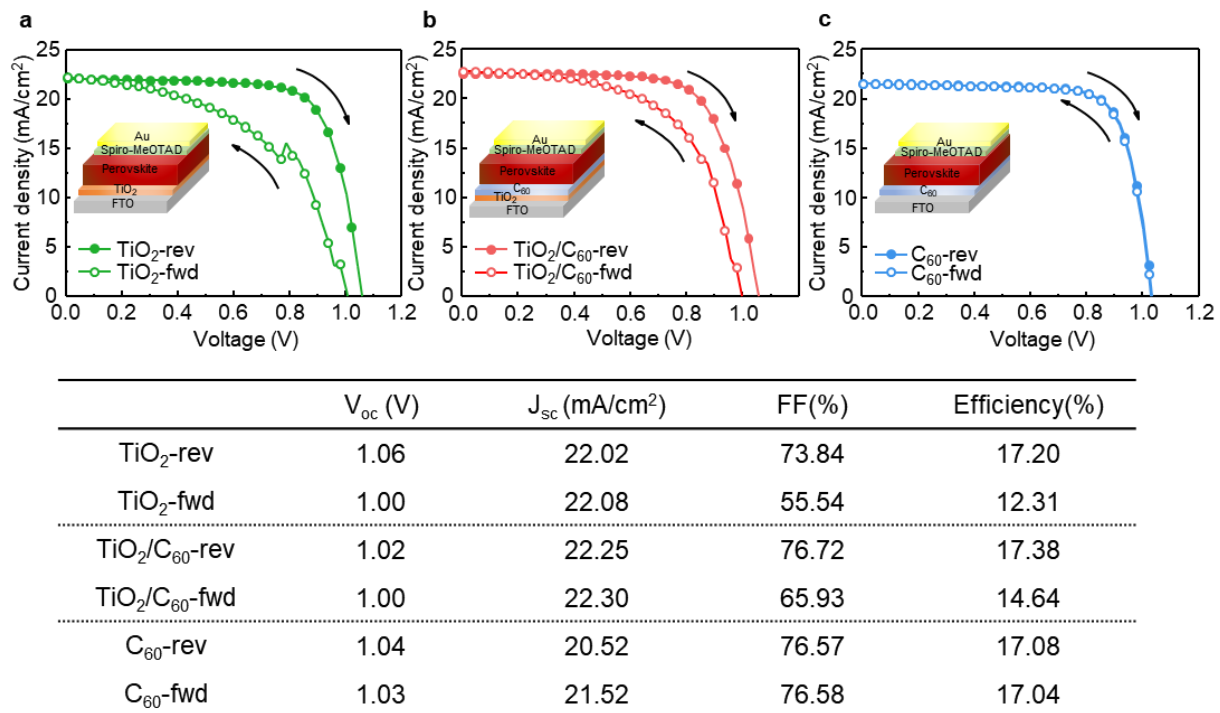

**Figure S3.** J-V characteristic of the (a)  $\text{TiO}_2$ -based, (b)  $\text{TiO}_2/\text{C}_{60}$ -based, (c)  $\text{C}_{60}$ -based devices measured in reverse (full circle) and forward (hollow circle) scan.

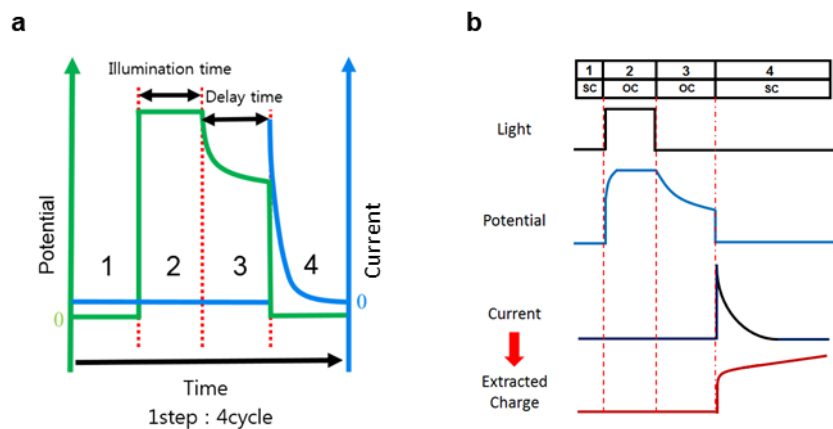

**Figure S4.** The sequence of the charge extraction measurement: 1) light off & short-circuit (SC) step in which charge remained in the device is extracted from the previous cycle; 2) light on & open-circuit (OC) step in which photocurrent is generated and carriers are recombined; 3) light off & OC step in which charge generation is stopped and accumulated charge inside the device is relaxed and recombined under certain delay time; 4) light off & SC step in which remnant accumulated charge is extracted. (a) An illustration of the potential and current values as a function of the steps, and (b) values of the extracted charge by integration of the current profile.

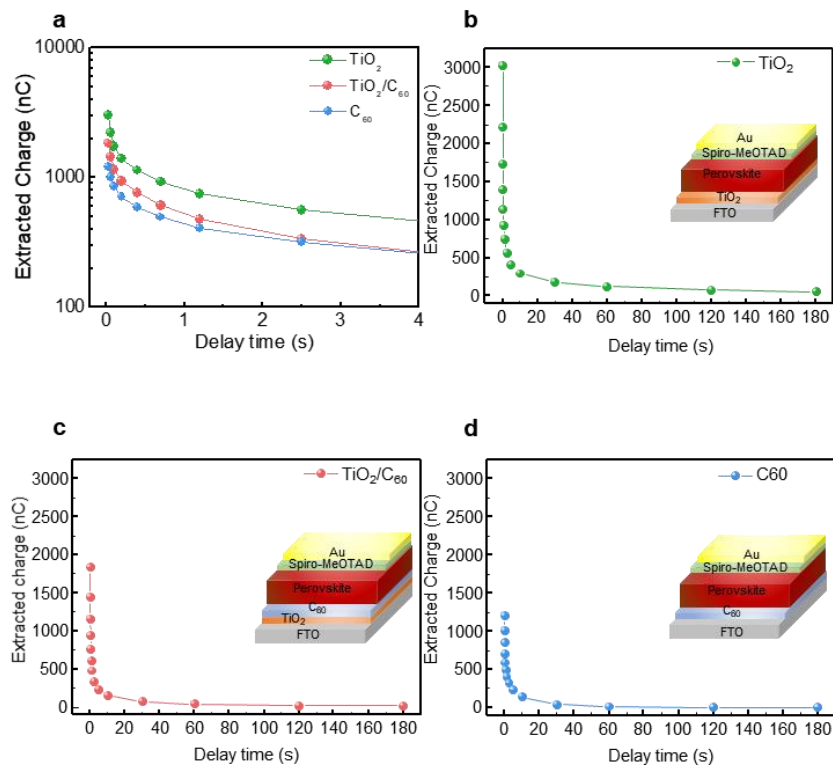

| Q (nC)                       | 0.03 s  | 0.06 s  | 0.1 s   | 0.4 s   | 1.2 s  | 5 s    | 10 s   | 30 s   | 60 s   | 180 s |
|------------------------------|---------|---------|---------|---------|--------|--------|--------|--------|--------|-------|
| $\text{TiO}_2$               | 3025.52 | 2213.63 | 1738.15 | 1134.74 | 747.73 | 410.59 | 296.04 | 183.12 | 124.87 | 56.33 |
| $\text{TiO}_2/\text{C}_{60}$ | 1833.67 | 1448.08 | 1154.97 | 762.99  | 476.79 | 229.69 | 152.36 | 73.60  | 41.13  | 13.80 |
| $\text{C}_{60}$              | 1207.13 | 1012.23 | 849.92  | 591.36  | 406.43 | 229.33 | 143.29 | 40.44  | 12.18  | 2.04  |

**Figure S5.** a) Quantity of extracted charges as a function of switching delay time up to 4s for the three different devices. Quantity of extracted charges delay time up to 180 s of b) the  $\text{TiO}_2$ -based device, c)  $\text{TiO}_2/\text{C}_{60}$ -based and d)  $\text{C}_{60}$ -based device, respectively.

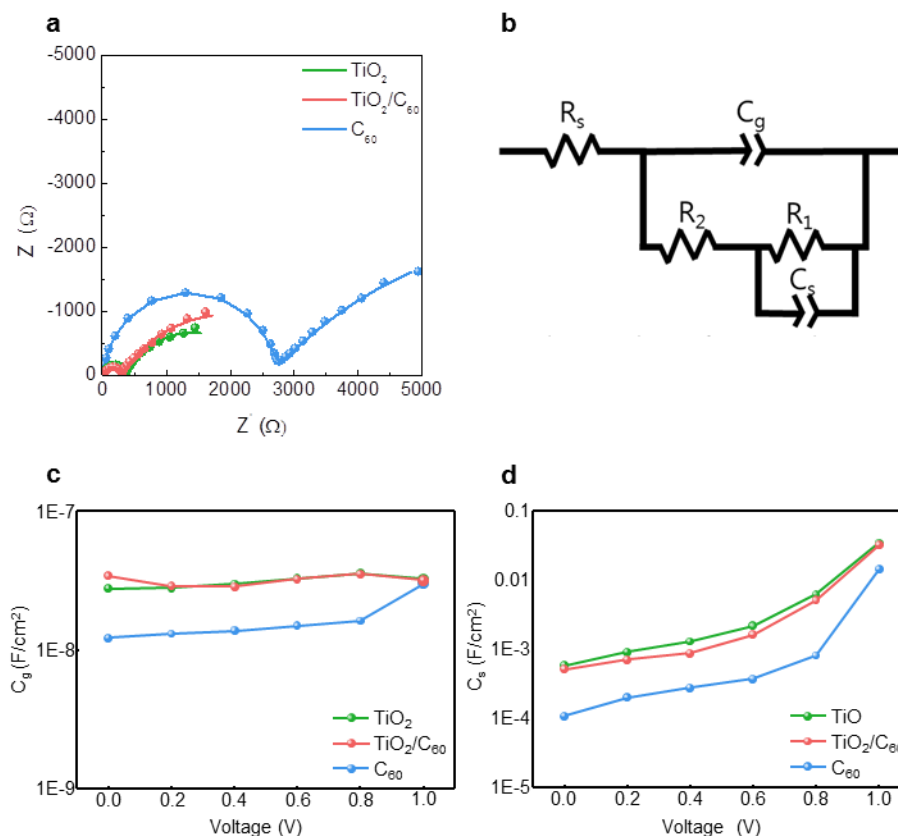

**Figure S6.** (a) Nyquist plots ( $Z''$ - $Z'$ ) of the PSCs with different ETLs. (b) An equivalent circuit employed in this study and (c) the values of the geometrical capacitance and (d) surface accumulation capacitance depending on the applied voltage. EIS measurements are performed under a LED light source and ambient conditions. Here,  $R_s$  is ohmic contribution of contacts and wires;  $C_g$  is geometrical capacitance, which is dielectric response of the perovskite layer;  $C_s$  is capacitance of surface charge accumulation at the interfaces; and  $R_1$  and  $R_2$  are the resistance of recombination current flux.

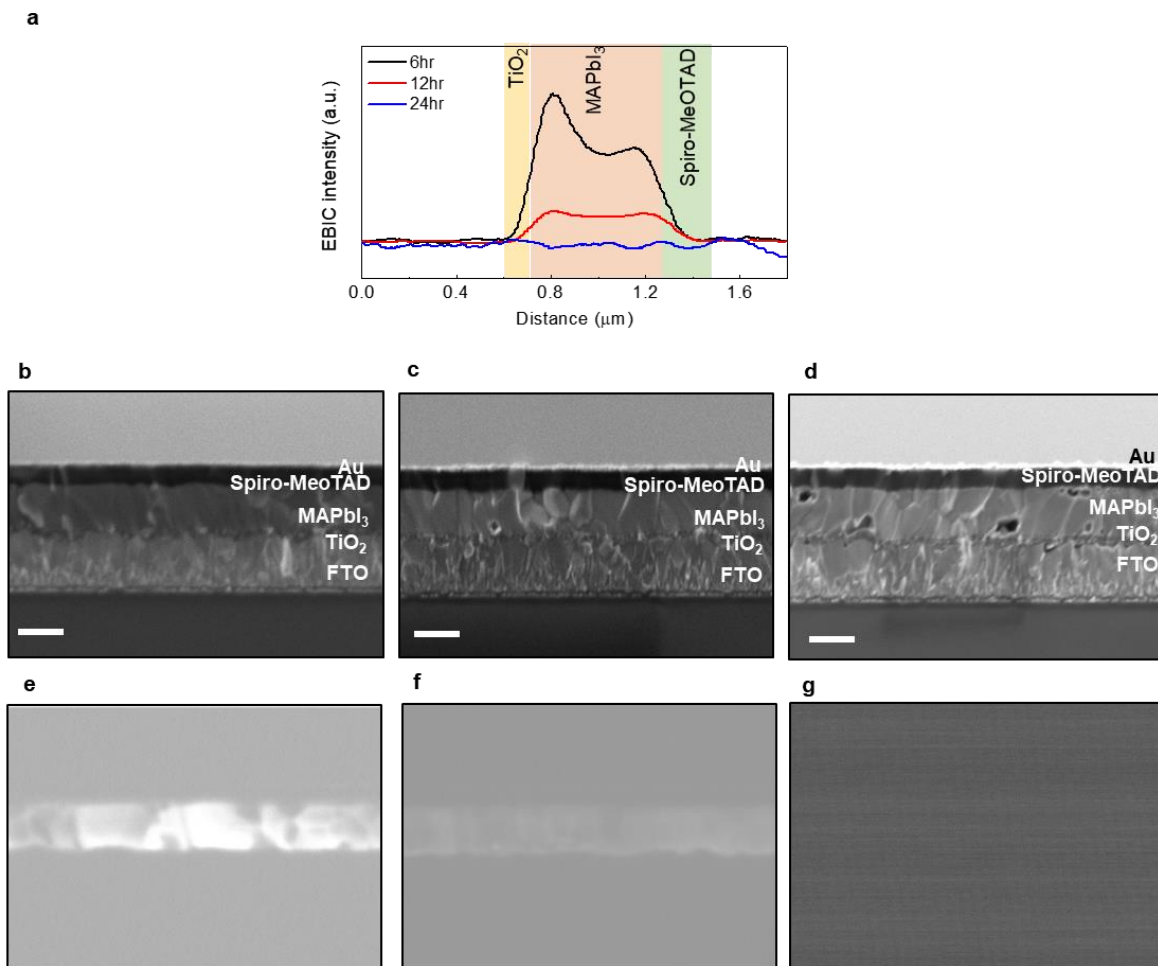

**Figure S7.** Time evolution of cross-sectional SEM and EBIC images of  $\text{TiO}_2$ -based device. a) Line profiles of EBIC signal perpendicular to the layers of the  $\text{TiO}_2$ -based device with different light soaking time. Cross-sectional SEM image of the  $\text{TiO}_2$ -based device after b) 6 hr under 1 sun light illumination, c) 12 hr under 1 sun light illumination and, d) 24 hr under 1 sun illumination. Cross-sectional EBIC image of the  $\text{TiO}_2$ -based device after e) 6 hr 1 sun light illumination, f) 12 hr 1 sun light illumination and g) 24 hr 1 sun light illumination. All samples were stored under 1 sun in air. Scale bars, 500 nm



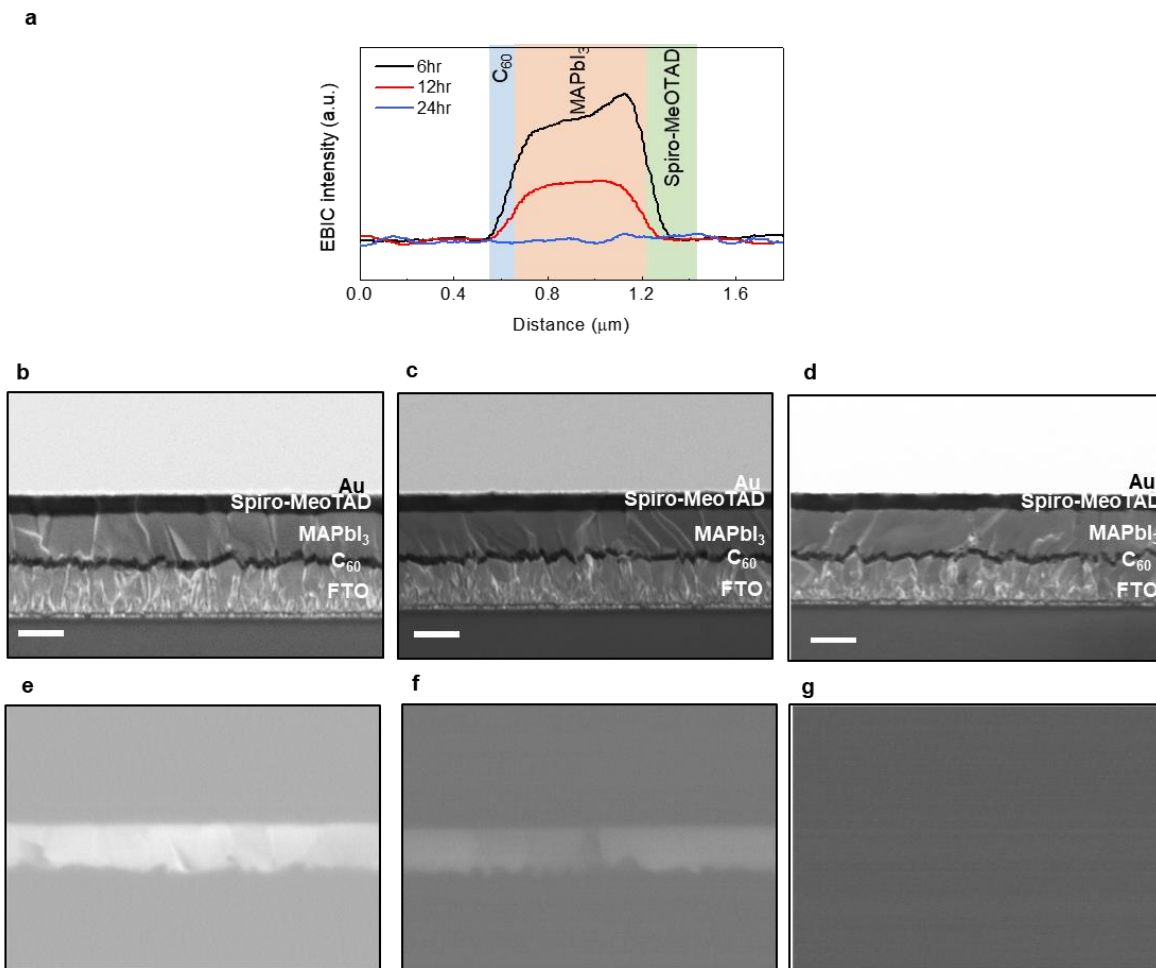

**Figure S8.** Time evolution of cross-sectional SEM and EBIC images of  $C_{60}$ -based device. a) Line profiles of EBIC signal perpendicular to the layers of the  $C_{60}$ -based device with different light soaking time. Cross-sectional SEM image of the  $C_{60}$ -based device after b) 6 hr under 1 sun light illumination, c) 12 hr under 1 sun light illumination and, d) 24 hr under 1 sun illumination. Cross-sectional EBIC image of the  $C_{60}$ -based device after e) 6hr under 1sun light illumination, f) 12 hr under 1sun light illumination and g) 24 hr under 1sun light illumination. All samples were stored under 1sun in air. Scale bars, 500 nm

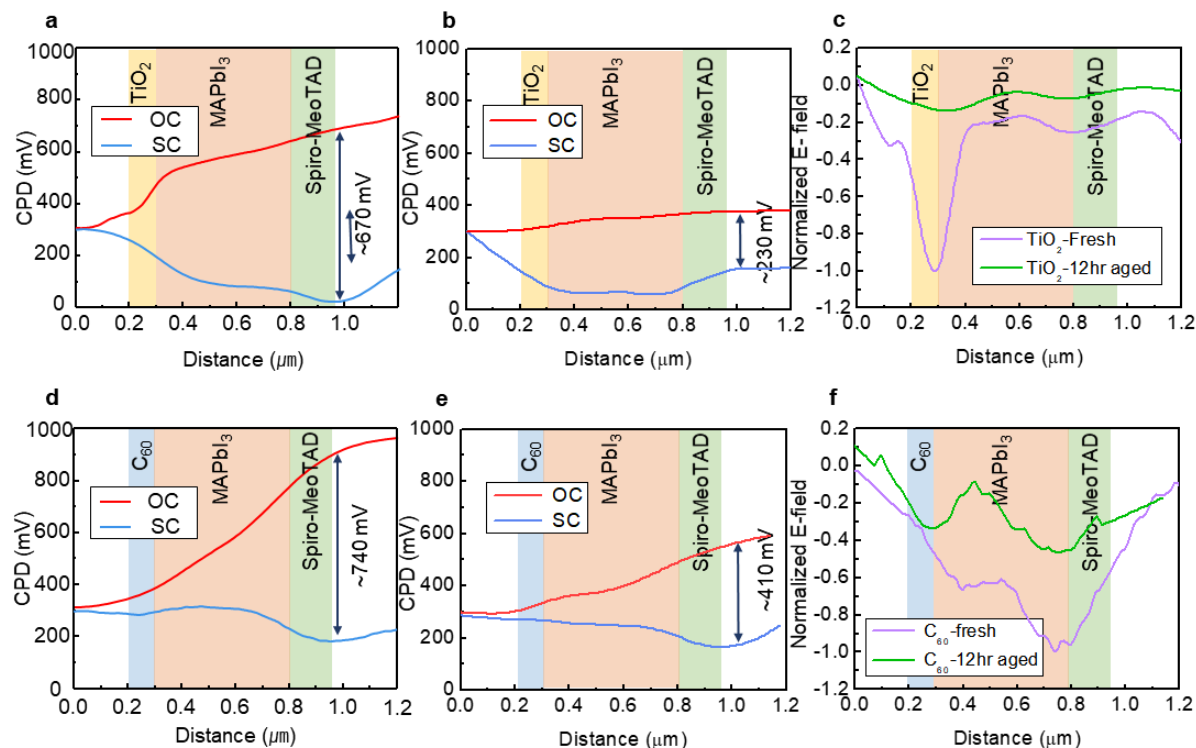

**Figure S9.** CPD distribution under illumination at open circuit condition (red line) and at short circuit condition (blue line) of fresh a)  $\text{TiO}_2$ -based and d)  $\text{C}_{60}$ -based device, respectively. CPD distribution under illumination at open circuit condition (red line) and at short circuit condition (blue line) of 12 hr aged b)  $\text{TiO}_2$ -based and e)  $\text{C}_{60}$ -based device, respectively. The arrow marks built up  $V_{oc}$ . c) Normalized E-field distribution under illumination at open circuit condition of the fresh  $\text{TiO}_2$ -based (purple line) and 12 hr aged  $\text{TiO}_2$ -based device (green line). f) Normalized E-field distribution under illumination at open circuit condition of the fresh  $\text{C}_{60}$ -based (purple line) and 12 hr aged  $\text{C}_{60}$ -based device (green line).

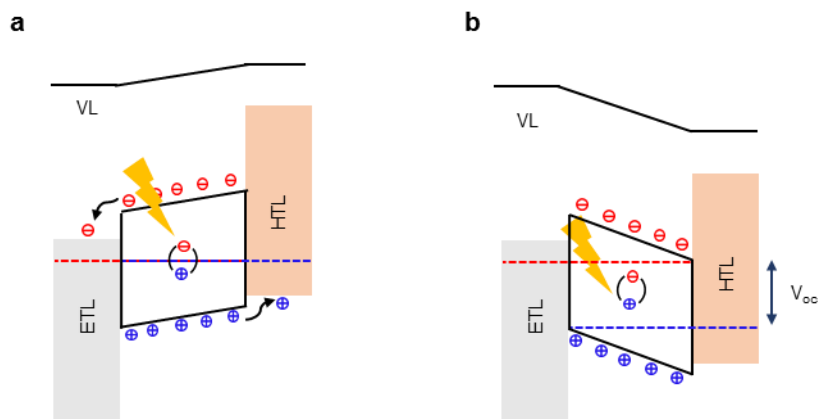

**Figure S10.** Schematic illustrations of band diagrams of device with ideal p-i-n junction type under light illumination in (a) short-circuit state and (b) open-circuit state. VL: vacuum level; ETL, electron-transporting layer; HTL, hole-transporting layer;  $V_{oc}$ , open-circuit voltage
